# Supplementary material for: High thermoelectric performance of (AgCrSe2)0.5(CuCrSe2)0.5nano-composites having all-scale natural hierarchical architectures
Source: Royal Society of Chemistry journal article supplement (doi:10.1039/c4ta04056b), 2014-08-12
Supplement: c4ta04056b1.pdf [file c4ta04056b1.pdf]

## High thermoelectric performance of $(\text{AgCrSe}_2)_{0.5}(\text{CuCrSe}_2)_{0.5}$ nano-composites having all-scale natural hierarchical architectures

Shovit Bhattacharya<sup>1</sup>, Anil Bohra<sup>1</sup>, Ranita Basu<sup>1</sup>, Ranu Bhatt<sup>1</sup>, Sajid Ahmed<sup>1,4</sup>, , K. N. Meshram<sup>1</sup>, A. K. Debnath<sup>1</sup>, Ajay Singh<sup>1\*</sup>, Shaibal K. Sarkar<sup>2</sup>, M. Navneethan<sup>3</sup>, Y. Hayakawa<sup>3</sup>, D. K. Aswal<sup>1\*</sup>, S. K. Gupta<sup>1</sup>

<sup>1</sup>Technical Physics Division, Bhabha Atomic Research Center, Mumbai-400 085, India

<sup>2</sup>Dept. of Energy Science and Engineering, IIT Bombay, Powai, Mumbai-400076, India

<sup>3</sup>National University Corporation, Shizuoka University, Hamamatsu-4328011, Japan

<sup>4</sup>Astrophysical Sciences Division, Bhabha Atomic Research Center, Mumbai-400 085, India

### Supplementary information

**S1 : Analysis of powder X-ray diffraction (XRD) data- Calculated Bragg peak positions for pure  $\text{AgCrSe}_2$  and  $\text{CuCrSe}_2$**

**Calculated Peak Positions for  $\text{AgCrSe}_2$**

| h | k | l  | 2 $\theta$ (in degree) | d (Å)   | Intensity |
|---|---|----|------------------------|---------|-----------|
| 0 | 0 | 6  | 25.399                 | 3.504   | 11.78     |
| 1 | 0 | 1  | 28.225                 | 3.15918 | 337.79    |
| 0 | 1 | 2  | 29.186                 | 3.05733 | 605.45    |
| 1 | 0 | 4  | 32.773                 | 2.73044 | 579.96    |
| 0 | 1 | 5  | 35.248                 | 2.54416 | 288.67    |
| 0 | 0 | 9  | 38.507                 | 2.336   | 82.07     |
| 1 | 0 | 7  | 41.217                 | 2.18849 | 902.71    |
| 0 | 1 | 8  | 44.606                 | 2.02974 | 390.62    |
| 1 | 1 | 0  | 49.357                 | 1.8449  | 723.24    |
| 1 | 1 | 3  | 51.158                 | 1.78411 | 70.34     |
| 1 | 0 | 10 | 52.027                 | 1.75635 | 54.23     |
| 0 | 0 | 12 | 52.165                 | 1.752   | 66.92     |
| 0 | 1 | 11 | 56.019                 | 1.64026 | 158.82    |

|   |   |    |        |         |        |
|---|---|----|--------|---------|--------|
| 1 | 1 | 6  | 56.311 | 1.63245 | 7.37   |
| 0 | 2 | 1  | 57.83  | 1.59314 | 42.81  |
| 2 | 0 | 2  | 58.373 | 1.57959 | 92.66  |
| 0 | 2 | 4  | 60.517 | 1.52866 | 92.28  |
| 2 | 0 | 5  | 62.096 | 1.49354 | 50.56  |
| 1 | 1 | 9  | 64.287 | 1.44782 | 101.57 |
| 1 | 0 | 13 | 64.53  | 1.44296 | 4.57   |
| 0 | 2 | 7  | 66.199 | 1.41056 | 179.64 |
| 0 | 0 | 15 | 66.677 | 1.4016  | 45.36  |
| 2 | 0 | 8  | 68.698 | 1.36522 | 83.52  |
| 0 | 1 | 14 | 69.05  | 1.35911 | 52.46  |
| 0 | 2 | 10 | 74.536 | 1.27208 | 15.15  |
| 1 | 1 | 12 | 74.65  | 1.27042 | 100.36 |
| 2 | 0 | 11 | 77.863 | 1.22583 | 43.5   |
| 1 | 0 | 16 | 78.67  | 1.21526 | 2.84   |
| 2 | 1 | 1  | 79.41  | 1.20578 | 22.77  |
| 1 | 2 | 2  | 79.879 | 1.19988 | 56.76  |

### Calculated Peak Positions for CuCrSe<sub>2</sub>

| h | k | l  | 2 $\theta$ (in degree) | d (Å)   | Intensity |
|---|---|----|------------------------|---------|-----------|
| 0 | 0 | 6  | 27.565                 | 3.23333 | 58.71     |
| 1 | 0 | 1  | 28.441                 | 3.13567 | 350.28    |
| 0 | 1 | 2  | 29.559                 | 3.01957 | 267.74    |
| 1 | 0 | 4  | 33.694                 | 2.65785 | 352.88    |
| 0 | 1 | 5  | 36.522                 | 2.45831 | 86.92     |
| 0 | 0 | 9  | 41.876                 | 2.15556 | 11.02     |
| 1 | 0 | 7  | 43.285                 | 2.08859 | 353.71    |
| 0 | 1 | 8  | 47.105                 | 1.92773 | 514.06    |
| 1 | 1 | 0  | 49.656                 | 1.8345  | 500.28    |
| 1 | 1 | 3  | 51.757                 | 1.76486 | 60.9      |
| 1 | 0 | 10 | 55.449                 | 1.65578 | 42.47     |
| 0 | 0 | 12 | 56.911                 | 1.61667 | 16.34     |
| 1 | 1 | 6  | 57.733                 | 1.59557 | 44.95     |
| 0 | 2 | 1  | 58.219                 | 1.58342 | 50.97     |
| 2 | 0 | 2  | 58.854                 | 1.56783 | 35.25     |
| 0 | 1 | 11 | 59.939                 | 1.54203 | 34.55     |
| 0 | 2 | 4  | 61.355                 | 1.50978 | 52.85     |
| 2 | 0 | 5  | 63.192                 | 1.47025 | 14.37     |
| 1 | 1 | 9  | 66.923                 | 1.39705 | 16.45     |

|   |   |    |        |         |        |
|---|---|----|--------|---------|--------|
| 0 | 2 | 7  | 67.955 | 1.37832 | 74.25  |
| 1 | 0 | 13 | 69.539 | 1.35075 | 15.77  |
| 2 | 0 | 8  | 70.851 | 1.32892 | 114.59 |
| 0 | 0 | 15 | 73.11  | 1.29333 | 30.99  |
| 0 | 1 | 14 | 74.666 | 1.27018 | 4.66   |
| 0 | 2 | 10 | 77.613 | 1.22915 | 10.7   |
| 1 | 1 | 12 | 78.853 | 1.2129  | 25.22  |
| 2 | 1 | 1  | 79.976 | 1.19867 | 30.44  |

### XRD pattern for the hot pressed $(\text{AgCrSe}_2)_{0.5}(\text{CuCrSe}_2)_{0.5}$ pellets

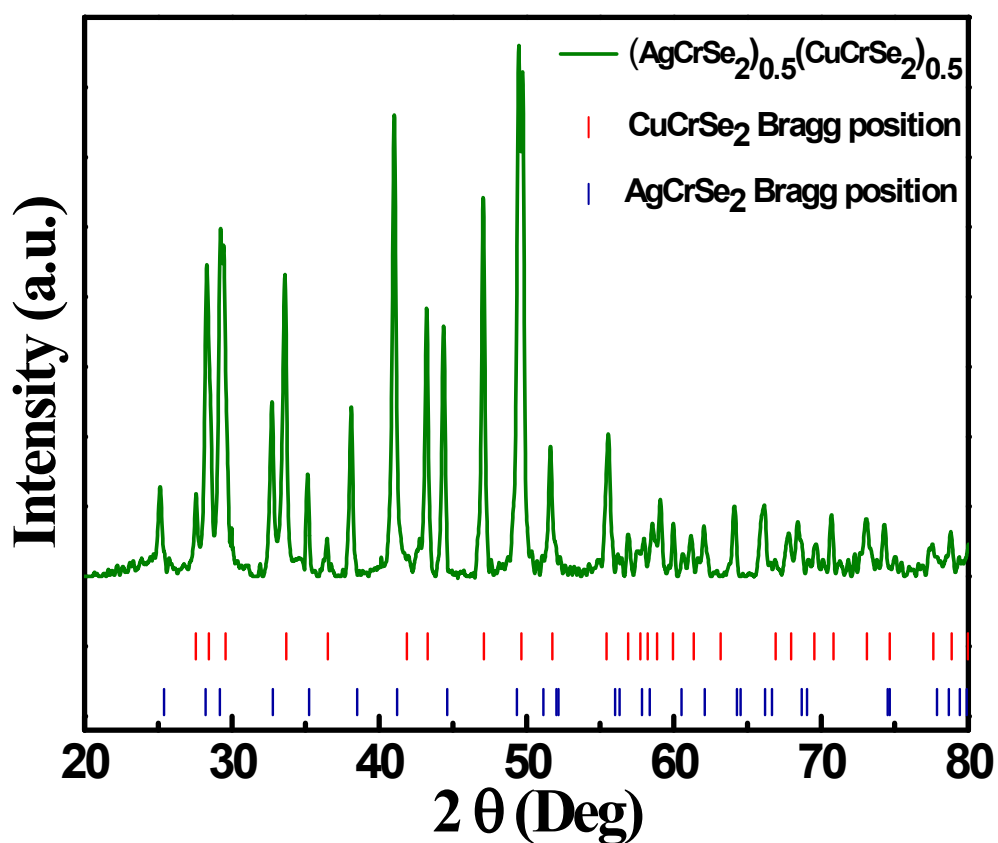

**Figure S1:** XRD pattern for the hot pressed  $(\text{AgCrSe}_2)_{0.5}(\text{CuCrSe}_2)_{0.5}$  pellets

From Figure S1, it can be seen that there are multiple oriented peaks in the XRD spectra of hot pressed  $(\text{AgCrSe}_2)_{0.5}(\text{CuCrSe}_2)_{0.5}$  pellets, which suggest the absence of any kind of texturing in the hot pressed pellets.

## S2: Thermal diffusivity ( $D$ ) and specific heat ( $C_p$ ) data used for the estimation of thermal conductivity ( $k$ )

The temperature dependence of thermal diffusivity ( $D$ ) and specific heat ( $C_p$ ) data for all samples is shown in Fig. S2, for pure samples the presence of transitions can be clearly seen at 365 K (for  $\text{CuCrSe}_2$ ) and 450 K (for  $\text{AgCrSe}_2$ ). In the composite sample data, transition features for both  $\text{CuCrSe}_2$  and  $\text{AgCrSe}_2$  components can be clearly seen. It may be noted that the experimentally obtained high temperature  $C_p$  values were found to be 0.4 J/gm K, 0.3 J/gm K and 0.33 for  $\text{CuCrSe}_2$ ,  $\text{AgCrSe}_2$  and composite samples compares very well with theoretically estimated Dulong-Petit value. The Dulong-Petit  $C_p$  values were respectively found to be 0.37 J/gm K, 0.31 J/gm K and 0.32 for  $\text{CuCrSe}_2$ ,  $\text{AgCrSe}_2$  and composite samples.

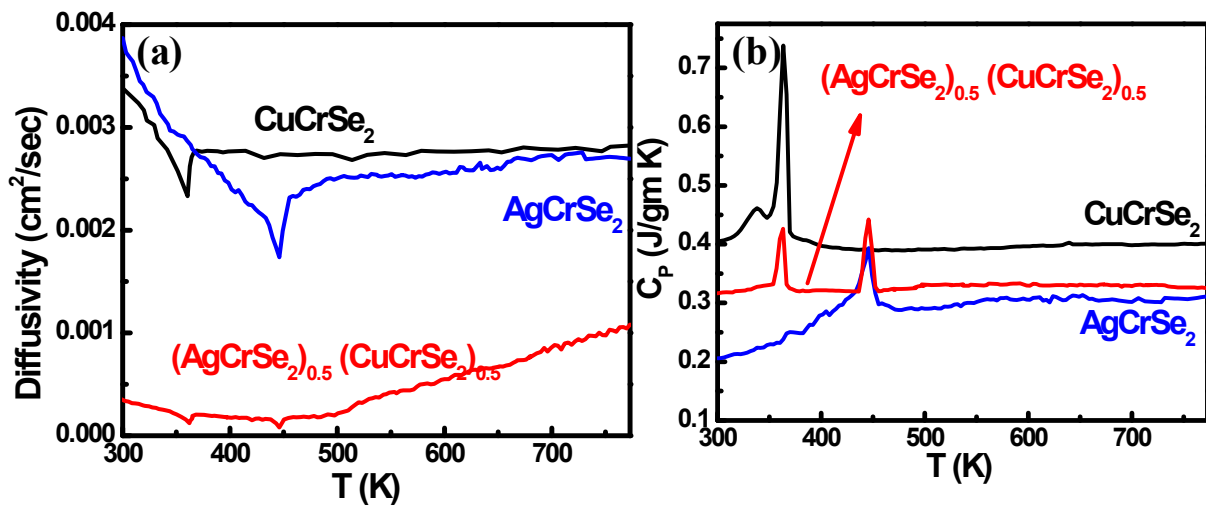

**Figure S2:** (a) Thermal diffusivity ( $D$ ) and (b) specific heat ( $C_p$ ) results for  $\text{AgCrSe}_2$ ,  $\text{CuCrSe}_2$  and  $(\text{AgCrSe}_2)_{0.5}(\text{CuCrSe}_2)_{0.5}$  samples.

Thermal conductivity ( $k$ ) can be calculated from the  $C_p$  and thermal diffusivity ( $D$ ), using the following relation  $k = C_p \times D \times d$ , Where,  $C_p$  is the specific heat and  $D$  is the thermal

diffusivity and  $d$  is the density of the sample. In the calculation of thermal conductivity the mass density (estimated using Archimedes method) used for pure  $\text{CuCrSe}_2$ ,  $\text{AgCrSe}_2$  and composite samples were respectively 6.31, 6.69 and 6.49 gm/cc.

### S3: Estimation of the band gap

Room temperature optical diffused reflectance measurements were performed on hot pressed samples to estimate the optical energy gap of the materials. The spectra were taken in the mid IR range ( $400\text{-}7000\text{ cm}^{-1}$ ) using a FTIR spectrometer (Bruker 80 V). The reflectance versus wave number data were used to estimate the band gap by converting reflectance to the absorption data according to Kubelka-Munk equations  $\alpha/S = (1 - R)^2 / (2R)$ , where  $R$  is the reflectance,  $\alpha$  and  $S$  are the absorption and scattering coefficient respectively.

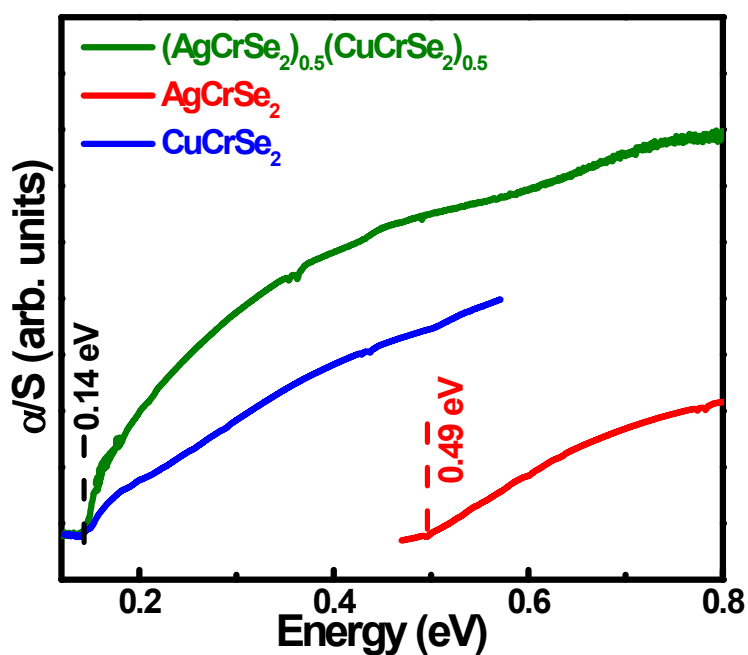

Figure S3: Electronic absorption spectra for the samples

The plots of  $\alpha/S$  versus energy for pure  $\text{AgCrSe}_2$ ,  $\text{CuCrSe}_2$  and  $(\text{AgCrSe}_2)_{0.5}(\text{CuCrSe}_2)_{0.5}$  composite samples are shown in Figure S3. From Fig. S3 it can be seen that for pure  $\text{AgCrSe}_2$  and  $\text{CuCrSe}_2$  the band gap values are 0.49 eV and 0.14 eV respectively, which are very close to the reported values.<sup>1,2</sup> For  $(\text{AgCrSe}_2)_{0.5}(\text{CuCrSe}_2)_{0.5}$  sample both band gap corresponding to pure  $\text{AgCrSe}_2$  and  $\text{CuCrSe}_2$  are clearly seen in the data.

#### **S4: Details of stability test of $(\text{AgCrSe}_2)_{0.5}(\text{CuCrSe}_2)_{0.5}$ samples at high current density**

**Figure S4:** (a) Photo graph of the test chamber (b) Inside view of the test chamber and details of electrical connections to the sample. (c) Sample photograph before stability test (d) Sample photograph after stability test.

The details of the stability test of  $(\text{AgCrSe}_2)_{0.5}(\text{CuCrSe}_2)_{0.5}$  are shown in Fig. S4. In order to perform the stability measurement of  $(\text{AgCrSe}_2)_{0.5}(\text{CuCrSe}_2)_{0.5}$  samples, we have measured the resistivity of these samples at 773 K by applying a constant high current density ( $\sim 50 \text{ A/cm}^2$ ) in a specially home-made test set up (Shown in Fig. S4(a)) and electrical contacts were taken by four fingers of silver (pressure contact) shown in Fig. S4(b). Before starting the four probe resistivity measurement, the chamber was first evacuated to  $2 \times 10^{-2}$  mbar pressure and then purged with argon gas to atmospheric pressure. At room temperature, unidirectional current of 2 Amp (current density  $\sim 50 \text{ A/cm}^2$ ) was applied on the sample and voltage was measured. Subsequently the sample temperature was raised to 773 K (heating rate  $\sim 13 \text{ K/min}$ ) and after achieving a stabilized temperature of 773K, the resistivity measurement was measured as a function of time. The constant current was applied using Keithley 2400 source meter and voltage was measured using Keithley 2182A nano-voltmeter. The data was collected (using Labview software) for 12 hrs at an interval of 20 seconds. The recorded data shown in Fig. 9 (b) suggest that sample is stable at high current density  $\sim 50 \text{ A/cm}^2$ . It is important to note that during resistivity measurement current was kept continuously ON for more than 12 hours.

**S5: Transmission electron microscope image of  $(\text{AgCrSe}_2)_{0.5}(\text{CuCrSe}_2)_{0.5}$  samples after performing 12 hrs annealing at 773K**

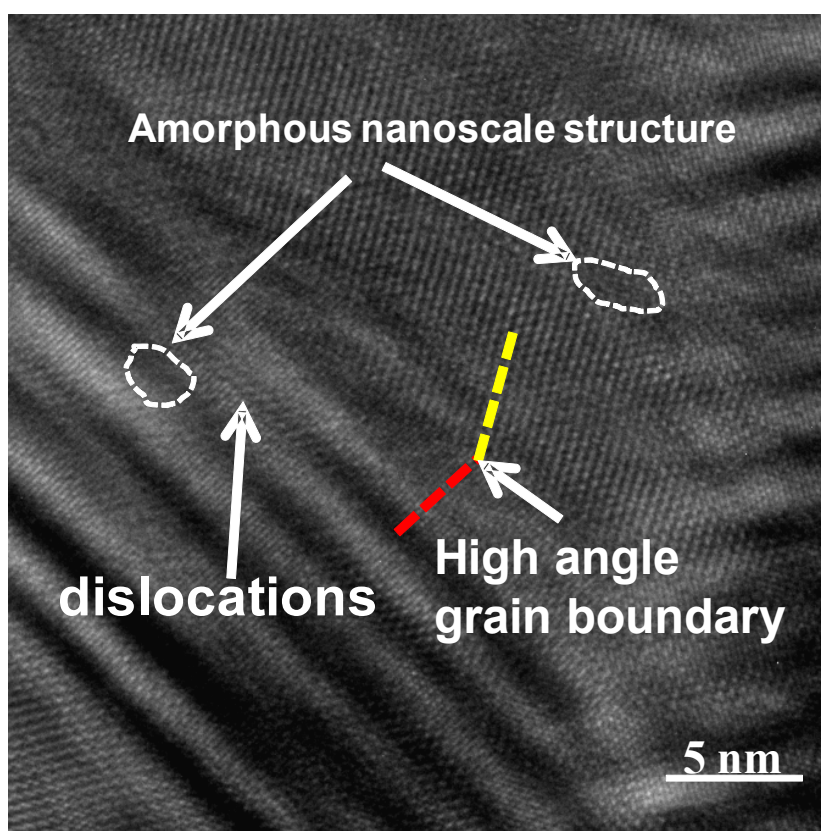

**Figure S5.** Transmission electron microscope (TEM) image of  $(\text{AgCrSe}_2)_{0.5}(\text{CuCrSe}_2)_{0.5}$  samples after 12 hrs of annealing at 773 K.. In the image, region inside white dotted lines shows the presence of nanoscale features with amorphous structure.
